# Supplementary material for: Advancing the use of Voronoi–Dirichlet polyhedra to describe interactions in organic molecular crystal structures by the example of galunisertib polymorphs
Source: Royal Society of Chemistry journal article supplement (doi:10.1039/d0ce01535k), 2020-12-17
Supplement: d0ce01535k1.pdf [file d0ce01535k1.pdf]

## ELECTRONIC SUPPLEMENTARY INFORMATION

### Advancing the use of Voronoi–Dirichlet polyhedra to describe interactions in organic molecular crystal structures by the example of galunisertib polymorphs

Viktor N. Serezhkin,\* Anton V. Savchenkov

*Samara National Research University, Samara, Russian Federation*

\* *E-mail:* [serezhkin@samsu.ru](mailto:serezhkin@samsu.ru)

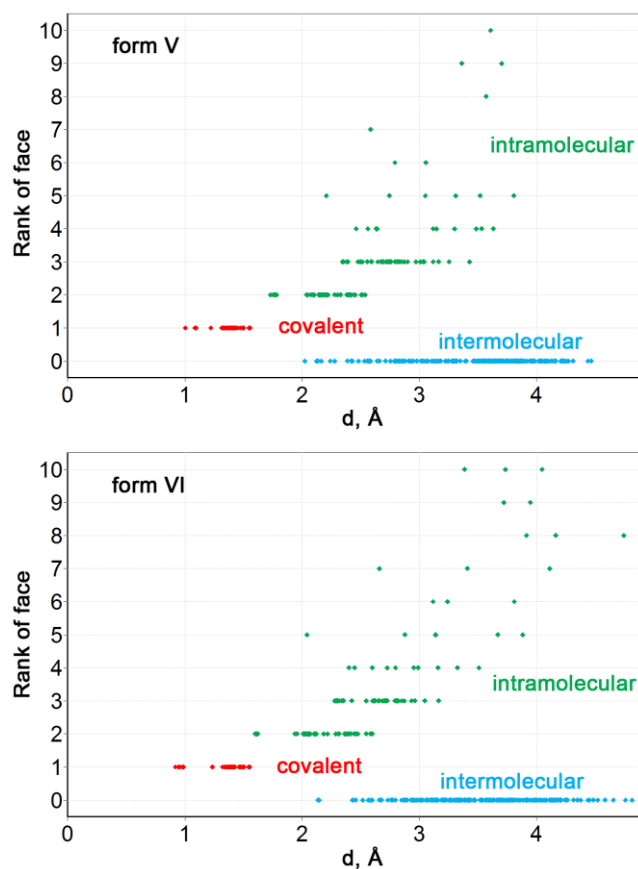

Fig. S1. (RF, d) distributions for molecular VD polyhedra of GAL molecules with the same  $^1k$  values equal to 246: form V (top) and form VI (bottom).

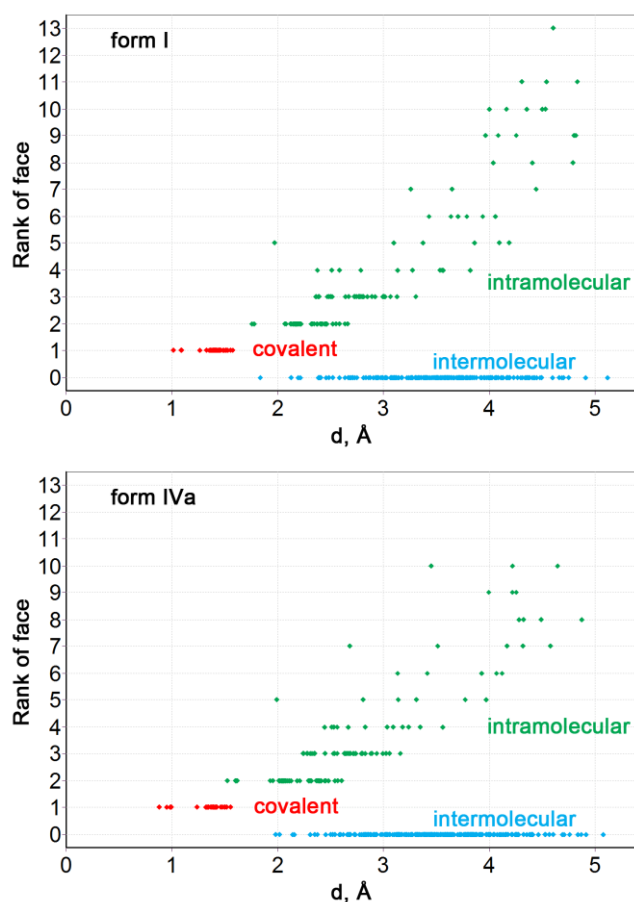

Fig. S2. (RF,  $d$ ) distributions for molecular VD polyhedra of GAL molecules with the same  $^1k$  values equal to 272: form I (top) and form IVa (bottom).

The following Tables S1–S3 include these characteristics of atomic interactions:

- $k$  – the number of pyramids representing interatomic contacts;
- $d_{\min}$  and  $d_{\max}$  (Å) – distances for the shortest and the longest contact respectively;
- $S$  (Å<sup>2</sup>) – the total surface area of all faces corresponding to the given type of contacts;
- $V$  (Å<sup>3</sup>) – the total volume of all pyramids corresponding to the given type of contacts;
- $\Delta_S$  (%) – partial contributions of contacts to the total surface area of the corresponding faces.

The last column  $\Sigma$  shows the cumulative values for each molecule.

Table S1. Characteristics of chemical bonds in GAL polymorphs (VD polyhedra faces with RF = 1)

| Form | Refcode  |            | H/C    | C/C    | H/N   | C/N    | N/N   | C/O   | $\Sigma$ |
|------|----------|------------|--------|--------|-------|--------|-------|-------|----------|
| I    | DORDUM09 | <i>k</i>   | 34     | 44     | 4     | 16     | 2     | 2     | 102      |
|      |          | $d_{\min}$ | 1.09   | 1.39   | 1.01  | 1.33   | 1.35  | 1.26  | 1.01     |
|      |          | $d_{\max}$ | 1.09   | 1.58   | 1.02  | 1.46   | 1.35  | 1.26  | 1.58     |
|      |          | <i>S</i>   | 193.38 | 301.27 | 22.84 | 104.73 | 14.20 | 14.09 | 650.52   |
|      |          | <i>V</i>   | 35.09  | 72.39  | 3.87  | 23.90  | 3.20  | 2.96  | 141.40   |
|      |          | $\Delta_S$ | 29.73  | 46.31  | 3.51  | 16.10  | 2.18  | 2.17  | 100.00   |
| II   | DORDUM   | <i>k</i>   | 34     | 44     | 4     | 16     | 2     | 2     | 102      |
|      |          | $d_{\min}$ | 0.95   | 1.36   | 0.88  | 1.31   | 1.35  | 1.23  | 0.88     |
|      |          | $d_{\max}$ | 0.99   | 1.55   | 0.88  | 1.48   | 1.35  | 1.23  | 1.55     |
|      |          | <i>S</i>   | 187.31 | 286.41 | 24.72 | 100.58 | 11.87 | 14.49 | 625.38   |
|      |          | <i>V</i>   | 30.07  | 67.76  | 3.63  | 22.66  | 2.68  | 2.97  | 129.75   |
|      |          | $\Delta_S$ | 29.95  | 45.80  | 3.95  | 16.08  | 1.90  | 2.32  | 100.00   |
| III  | DORDUM01 | <i>k</i>   | 34     | 44     | 4     | 16     | 2     | 2     | 102      |
|      |          | $d_{\min}$ | 0.95   | 1.36   | 0.88  | 1.32   | 1.35  | 1.24  | 0.88     |
|      |          | $d_{\max}$ | 0.99   | 1.55   | 0.88  | 1.46   | 1.35  | 1.24  | 1.55     |
|      |          | <i>S</i>   | 183.04 | 280.90 | 24.82 | 103.74 | 12.68 | 14.14 | 619.32   |
|      |          | <i>V</i>   | 29.39  | 66.41  | 3.64  | 23.35  | 2.85  | 2.91  | 128.55   |
|      |          | $\Delta_S$ | 29.55  | 45.36  | 4.01  | 16.75  | 2.05  | 2.28  | 100.00   |
| IV   | DORDUM02 | <i>k</i>   | 34     | 44     | 4     | 16     | 2     | 2     | 102      |
|      |          | $d_{\min}$ | 0.95   | 1.36   | 0.88  | 1.32   | 1.34  | 1.24  | 0.88     |
|      |          | $d_{\max}$ | 0.99   | 1.55   | 0.88  | 1.46   | 1.35  | 1.24  | 1.55     |
|      |          | <i>S</i>   | 181.22 | 283.40 | 24.71 | 103.19 | 13.31 | 13.65 | 619.48   |
|      |          | <i>V</i>   | 29.11  | 67.15  | 3.62  | 23.24  | 2.98  | 2.82  | 128.92   |
|      |          | $\Delta_S$ | 29.25  | 45.75  | 3.99  | 16.66  | 2.15  | 2.20  | 100.00   |
|      | IVa      | <i>k</i>   | 34     | 44     | 4     | 16     | 2     | 2     | 102      |
|      |          | $d_{\min}$ | 0.95   | 1.37   | 0.88  | 1.32   | 1.35  | 1.24  | 0.88     |
|      |          | $d_{\max}$ | 0.99   | 1.55   | 0.88  | 1.46   | 1.35  | 1.24  | 1.55     |
|      |          | <i>S</i>   | 183.79 | 289.34 | 27.33 | 105.21 | 13.40 | 13.49 | 632.56   |
|      |          | <i>V</i>   | 29.51  | 68.51  | 4.01  | 23.68  | 3.01  | 2.78  | 131.50   |
|      |          | $\Delta_S$ | 29.05  | 45.74  | 4.32  | 16.63  | 2.12  | 2.13  | 100.00   |
|      | IVb      | <i>k</i>   | 34     | 44     | 4     | 16     | 2     | 2     | 102      |
|      |          | $d_{\min}$ | 0.95   | 1.36   | 0.88  | 1.32   | 1.34  | 1.24  | 0.88     |
|      |          | $d_{\max}$ | 0.99   | 1.54   | 0.88  | 1.46   | 1.34  | 1.24  | 1.54     |
|      |          | <i>S</i>   | 178.66 | 277.46 | 22.09 | 101.16 | 13.22 | 13.81 | 606.40   |
|      |          | <i>V</i>   | 28.70  | 65.79  | 3.24  | 22.80  | 2.96  | 2.85  | 126.34   |
|      |          | $\Delta_S$ | 29.46  | 45.76  | 3.64  | 16.68  | 2.18  | 2.28  | 100.00   |
| V    | DORDUM03 | <i>k</i>   | 34     | 44     | 4     | 16     | 2     | 2     | 102      |
|      |          | $d_{\min}$ | 1.08   | 1.37   | 1.01  | 1.32   | 1.32  | 1.22  | 1.01     |
|      |          | $d_{\max}$ | 1.10   | 1.55   | 1.01  | 1.45   | 1.32  | 1.22  | 1.55     |
|      |          | <i>S</i>   | 189.29 | 290.95 | 22.62 | 99.98  | 13.24 | 15.32 | 631.40   |
|      |          | <i>V</i>   | 34.35  | 69.15  | 3.79  | 22.50  | 2.92  | 3.12  | 135.83   |
|      |          | $\Delta_S$ | 29.98  | 46.08  | 3.58  | 15.84  | 2.10  | 2.43  | 100.00   |
| VI   | DORDUM04 | <i>k</i>   | 34     | 44     | 4     | 16     | 2     | 2     | 102      |
|      |          | $d_{\min}$ | 0.95   | 1.36   | 0.92  | 1.32   | 1.35  | 1.23  | 0.92     |
|      |          | $d_{\max}$ | 0.99   | 1.55   | 0.96  | 1.46   | 1.35  | 1.23  | 1.55     |
|      |          | <i>S</i>   | 185.48 | 281.89 | 21.07 | 96.48  | 13.50 | 14.25 | 612.67   |
|      |          | <i>V</i>   | 29.78  | 66.82  | 3.30  | 21.75  | 3.04  | 2.93  | 127.61   |
|      |          | $\Delta_S$ | 30.27  | 46.01  | 3.44  | 15.75  | 2.20  | 2.33  | 100.00   |

Table S1 (continued)

| Form       | Refcode  |            | H/C    | C/C    | H/N    | C/N    | N/N   | C/O    | $\Sigma$ |
|------------|----------|------------|--------|--------|--------|--------|-------|--------|----------|
| VII        | DORDUM10 | <i>k</i>   | 34     | 44     | 4      | 16     | 2     | 2      | 102      |
|            |          | $d_{\min}$ | 1.06   | 1.35   | 1.00   | 1.29   | 1.31  | 1.22   | 1.00     |
|            |          | $d_{\max}$ | 1.11   | 1.55   | 1.03   | 1.43   | 1.32  | 1.23   | 1.55     |
|            |          | <i>S</i>   | 189.96 | 278.72 | 23.02  | 100.47 | 13.74 | 13.71  | 619.61   |
|            |          | <i>V</i>   | 34.20  | 65.40  | 3.87   | 22.34  | 3.01  | 2.80   | 131.61   |
|            |          | $\Delta_S$ | 30.66  | 44.98  | 3.71   | 16.22  | 2.22  | 2.21   | 100.00   |
|            | VIIa     | <i>k</i>   | 34     | 44     | 4      | 16     | 2     | 2      | 102      |
|            |          | $d_{\min}$ | 1.06   | 1.35   | 1.00   | 1.29   | 1.32  | 1.23   | 1.00     |
|            |          | $d_{\max}$ | 1.11   | 1.55   | 1.02   | 1.43   | 1.32  | 1.23   | 1.55     |
|            |          | <i>S</i>   | 187.78 | 285.26 | 22.74  | 100.44 | 13.39 | 12.90  | 622.51   |
|            |          | <i>V</i>   | 33.75  | 66.95  | 3.82   | 22.33  | 2.95  | 2.64   | 132.44   |
|            |          | $\Delta_S$ | 30.16  | 45.82  | 3.65   | 16.13  | 2.15  | 2.07   | 100.00   |
|            | VIIb     | <i>k</i>   | 34     | 44     | 4      | 16     | 2     | 2      | 102      |
|            |          | $d_{\min}$ | 1.07   | 1.36   | 1.00   | 1.31   | 1.31  | 1.22   | 1.00     |
|            |          | $d_{\max}$ | 1.11   | 1.53   | 1.03   | 1.42   | 1.31  | 1.22   | 1.53     |
| <i>S</i>   |          | 192.13     | 272.18 | 23.29  | 100.50 | 14.08  | 14.52 | 616.70 |          |
| <i>V</i>   |          | 34.64      | 63.85  | 3.93   | 22.34  | 3.07   | 2.95  | 130.79 |          |
| $\Delta_S$ |          | 31.16      | 44.13  | 3.78   | 16.30  | 2.28   | 2.35  | 100.00 |          |
| VIII       | DORDUM05 | <i>k</i>   | 34     | 44     | 4      | 16     | 2     | 2      | 102      |
|            |          | $d_{\min}$ | 1.06   | 1.35   | 1.03   | 1.33   | 1.35  | 1.27   | 1.03     |
|            |          | $d_{\max}$ | 1.10   | 1.53   | 1.03   | 1.42   | 1.35  | 1.27   | 1.53     |
|            |          | <i>S</i>   | 179.61 | 275.37 | 22.90  | 98.75  | 11.62 | 15.21  | 603.45   |
|            |          | <i>V</i>   | 32.51  | 64.87  | 3.92   | 22.12  | 2.61  | 3.21   | 129.24   |
|            |          | $\Delta_S$ | 29.76  | 45.63  | 3.79   | 16.36  | 1.92  | 2.52   | 100.00   |
| IX         | DORDUM06 | <i>k</i>   | 34     | 44     | 4      | 16     | 2     | 2      | 102      |
|            |          | $d_{\min}$ | 1.08   | 1.37   | 1.00   | 1.32   | 1.33  | 1.22   | 1.00     |
|            |          | $d_{\max}$ | 1.10   | 1.55   | 1.01   | 1.45   | 1.33  | 1.22   | 1.55     |
|            |          | <i>S</i>   | 192.75 | 283.11 | 27.18  | 99.73  | 13.61 | 17.08  | 633.46   |
|            |          | <i>V</i>   | 34.98  | 67.23  | 4.56   | 22.44  | 3.01  | 3.48   | 135.69   |
|            |          | $\Delta_S$ | 30.43  | 44.69  | 4.29   | 15.74  | 2.15  | 2.70   | 100.00   |
| X          | DORDUM07 | <i>k</i>   | 34     | 44     | 4      | 16     | 2     | 2      | 102      |
|            |          | $d_{\min}$ | 0.95   | 1.37   | 0.88   | 1.32   | 1.35  | 1.25   | 0.88     |
|            |          | $d_{\max}$ | 0.99   | 1.55   | 0.88   | 1.46   | 1.35  | 1.25   | 1.55     |
|            |          | <i>S</i>   | 176.76 | 272.12 | 23.48  | 99.22  | 14.01 | 12.12  | 597.70   |
|            |          | <i>V</i>   | 28.39  | 64.46  | 3.44   | 22.31  | 3.16  | 2.53   | 124.28   |
|            |          | $\Delta_S$ | 29.57  | 45.53  | 3.93   | 16.60  | 2.34  | 2.03   | 100.00   |

Table S2. Characteristics of intramolecular noncovalent interactions in GAL polymorphs (VD polyhedra faces with RF > 1)

| Form | Refcode  |            | H/H    | H/C   | C/C  | H/N   | C/N   | N/N | H/O   | C/O  | N/O | $\Sigma$ |
|------|----------|------------|--------|-------|------|-------|-------|-----|-------|------|-----|----------|
| I    | DORDUM09 | <i>k</i>   | 52     | 122   | 34   | 32    | 26    |     | 4     | 2    |     | 272      |
|      |          | $d_{\min}$ | 1.76   | 2.07  | 2.32 | 2.08  | 2.12  |     | 2.51  | 2.42 |     | 1.76     |
|      |          | $d_{\max}$ | 4.83   | 4.82  | 3.31 | 4.80  | 3.43  |     | 2.52  | 2.42 |     | 4.83     |
|      |          | <i>S</i>   | 125.56 | 81.57 | 5.45 | 50.75 | 16.89 |     | 8.52  | 0.04 |     | 288.78   |
|      |          | <i>V</i>   | 46.79  | 38.31 | 2.30 | 22.80 | 8.20  |     | 3.56  | 0.02 |     | 121.98   |
|      |          | $\Delta_S$ | 43.48  | 28.25 | 1.89 | 17.57 | 5.85  |     | 2.95  | 0.01 |     | 100.00   |
| II   | DORDUM   | <i>k</i>   | 52     | 116   | 44   | 24    | 26    |     | 4     | 2    |     | 268      |
|      |          | $d_{\min}$ | 1.52   | 1.93  | 2.22 | 1.94  | 2.13  |     | 2.44  | 2.37 |     | 1.52     |
|      |          | $d_{\max}$ | 4.32   | 4.68  | 3.20 | 3.83  | 3.82  |     | 2.48  | 2.37 |     | 4.68     |
|      |          | <i>S</i>   | 155.09 | 82.09 | 3.90 | 34.09 | 11.94 |     | 13.76 | 0.41 |     | 301.26   |
|      |          | <i>V</i>   | 57.08  | 36.43 | 1.55 | 14.60 | 5.59  |     | 5.67  | 0.16 |     | 121.07   |
|      |          | $\Delta_S$ | 51.48  | 27.25 | 1.29 | 11.31 | 3.96  |     | 4.57  | 0.13 |     | 100.00   |
| III  | DORDUM01 | <i>k</i>   | 50     | 118   | 44   | 24    | 26    |     | 4     | 2    |     | 268      |
|      |          | $d_{\min}$ | 1.52   | 1.93  | 2.21 | 1.95  | 2.11  |     | 2.44  | 2.36 |     | 1.52     |
|      |          | $d_{\max}$ | 4.09   | 4.63  | 5.10 | 4.50  | 3.25  |     | 2.46  | 2.36 |     | 5.10     |
|      |          | <i>S</i>   | 128.09 | 84.19 | 5.47 | 35.09 | 13.39 |     | 9.62  | 0.89 |     | 276.75   |
|      |          | <i>V</i>   | 46.82  | 38.39 | 2.69 | 14.68 | 6.47  |     | 3.94  | 0.35 |     | 113.33   |
|      |          | $\Delta_S$ | 46.29  | 30.42 | 1.98 | 12.68 | 4.84  |     | 3.48  | 0.32 |     | 100.00   |
| IV   | DORDUM02 | <i>k</i>   | 50     | 114   | 45   | 28    | 25    |     | 5     | 3    |     | 270      |
|      |          | $d_{\min}$ | 1.52   | 1.93  | 2.21 | 1.95  | 2.11  |     | 2.45  | 2.37 |     | 1.52     |
|      |          | $d_{\max}$ | 4.65   | 4.88  | 4.58 | 4.22  | 4.07  |     | 3.65  | 2.80 |     | 4.88     |
|      |          | <i>S</i>   | 130.23 | 73.77 | 4.17 | 35.83 | 14.66 |     | 11.30 | 0.42 |     | 270.37   |
|      |          | <i>V</i>   | 46.06  | 32.41 | 1.77 | 14.81 | 7.02  |     | 4.85  | 0.17 |     | 107.09   |
|      |          | $\Delta_S$ | 48.17  | 27.28 | 1.54 | 13.25 | 5.42  |     | 4.18  | 0.16 |     | 100.00   |
|      | IVa      | <i>k</i>   | 50     | 114   | 46   | 30    | 26    |     | 4     | 2    |     | 272      |
|      |          | $d_{\min}$ | 1.52   | 1.93  | 2.21 | 1.95  | 2.11  |     | 2.45  | 2.38 |     | 1.52     |
|      |          | $d_{\max}$ | 4.65   | 4.88  | 4.58 | 4.22  | 4.07  |     | 2.51  | 2.38 |     | 4.88     |
|      |          | <i>S</i>   | 130.32 | 67.46 | 4.34 | 30.62 | 14.78 |     | 9.90  | 0.44 |     | 257.86   |
|      |          | <i>V</i>   | 46.65  | 29.37 | 1.92 | 12.71 | 7.22  |     | 4.13  | 0.17 |     | 102.15   |
|      |          | $\Delta_S$ | 50.54  | 26.16 | 1.68 | 11.87 | 5.73  |     | 3.84  | 0.17 |     | 100.00   |
|      | IVb      | <i>k</i>   | 50     | 114   | 44   | 26    | 24    |     | 6     | 4    |     | 268      |
|      |          | $d_{\min}$ | 1.52   | 1.93  | 2.21 | 1.95  | 2.11  |     | 2.45  | 2.37 |     | 1.52     |
|      |          | $d_{\max}$ | 4.04   | 3.73  | 3.32 | 2.92  | 3.08  |     | 3.65  | 2.80 |     | 4.04     |
|      |          | <i>S</i>   | 130.13 | 80.07 | 4.00 | 41.04 | 14.54 |     | 12.70 | 0.41 |     | 282.88   |
|      |          | <i>V</i>   | 45.47  | 35.46 | 1.61 | 16.92 | 6.83  |     | 5.57  | 0.16 |     | 112.02   |
|      |          | $\Delta_S$ | 46.00  | 28.30 | 1.41 | 14.51 | 5.14  |     | 4.49  | 0.14 |     | 100.00   |

Table S2 (continued)

| Form | Refcode  |            | H/H    | H/C   | C/C  | H/N   | C/N   | N/N  | H/O   | C/O  | N/O   | $\Sigma$ |
|------|----------|------------|--------|-------|------|-------|-------|------|-------|------|-------|----------|
| V    | DORDUM03 | $k$        | 46     | 104   | 42   | 26    | 20    |      | 4     | 4    |       | 246      |
|      |          | $d_{\min}$ | 1.73   | 2.04  | 2.21 | 2.05  | 2.10  |      | 2.50  | 2.38 |       | 1.73     |
|      |          | $d_{\max}$ | 3.61   | 3.80  | 3.43 | 3.04  | 3.12  |      | 2.56  | 2.87 |       | 3.80     |
|      |          | $S$        | 95.31  | 60.67 | 4.07 | 45.67 | 10.27 |      | 10.75 | 1.03 |       | 227.77   |
|      |          | $V$        | 36.57  | 25.54 | 1.64 | 19.31 | 4.79  |      | 4.56  | 0.41 |       | 92.82    |
|      |          | $\Delta_S$ | 41.84  | 26.64 | 1.79 | 20.05 | 4.51  |      | 4.72  | 0.45 |       | 100.00   |
| VI   | DORDUM04 | $k$        | 50     | 102   | 38   | 26    | 24    |      | 4     | 2    |       | 246      |
|      |          | $d_{\min}$ | 1.60   | 1.94  | 2.22 | 1.96  | 2.11  |      | 2.42  | 2.37 |       | 1.60     |
|      |          | $d_{\max}$ | 4.05   | 4.74  | 3.17 | 3.74  | 3.67  |      | 2.45  | 2.37 |       | 4.74     |
|      |          | $S$        | 124.89 | 75.53 | 3.24 | 34.81 | 13.20 |      | 12.72 | 0.26 |       | 264.66   |
|      |          | $V$        | 44.33  | 33.12 | 1.30 | 15.17 | 6.26  |      | 5.17  | 0.10 |       | 105.46   |
|      |          | $\Delta_S$ | 47.19  | 28.54 | 1.22 | 13.15 | 4.99  |      | 4.81  | 0.10 |       | 100.00   |
| VII  | DORDUM10 | $k$        | 50     | 106   | 39   | 26    | 20    | 1    | 4     | 3    | 1     | 250      |
|      |          | $d_{\min}$ | 1.72   | 2.00  | 2.18 | 2.03  | 2.09  | 2.68 | 2.35  | 2.33 | 2.22  | 1.72     |
|      |          | $d_{\max}$ | 4.39   | 4.19  | 3.71 | 3.43  | 3.00  | 2.68 | 2.49  | 2.78 | 2.22  | 4.39     |
|      |          | $S$        | 112.47 | 62.81 | 3.92 | 29.77 | 6.68  | 1.73 | 10.07 | 1.07 | <0.01 | 228.52   |
|      |          | $V$        | 42.12  | 26.13 | 1.58 | 12.12 | 2.87  | 0.78 | 4.09  | 0.43 | <0.01 | 90.12    |
|      |          | $\Delta_S$ | 49.22  | 27.48 | 1.71 | 13.03 | 2.92  | 0.76 | 4.41  | 0.47 | <0.01 | 100.00   |
|      | VIIa     | $k$        | 48     | 104   | 38   | 24    | 18    | 2    | 4     | 2    | 2     | 242      |
|      |          | $d_{\min}$ | 1.72   | 2.00  | 2.26 | 2.03  | 2.09  | 2.68 | 2.35  | 2.33 | 2.22  | 1.72     |
|      |          | $d_{\max}$ | 3.57   | 4.13  | 3.71 | 3.43  | 2.73  | 2.68 | 2.44  | 2.33 | 2.22  | 4.13     |
|      |          | $S$        | 112.41 | 68.19 | 4.11 | 24.98 | 2.87  | 3.47 | 8.88  | 0.22 | <0.01 | 225.14   |
|      |          | $V$        | 41.24  | 28.54 | 1.67 | 9.93  | 1.08  | 1.55 | 3.52  | 0.09 | <0.01 | 87.62    |
|      |          | $\Delta_S$ | 49.93  | 30.29 | 1.83 | 11.10 | 1.27  | 1.54 | 3.95  | 0.10 | <0.01 | 100.00   |
|      | VIIb     | $k$        | 52     | 108   | 40   | 28    | 22    |      | 4     | 4    |       | 258      |
|      |          | $d_{\min}$ | 1.73   | 2.03  | 2.18 | 2.06  | 2.09  |      | 2.47  | 2.34 |       | 1.73     |
|      |          | $d_{\max}$ | 4.39   | 4.19  | 2.75 | 3.43  | 3.00  |      | 2.49  | 2.78 |       | 4.39     |
|      |          | $S$        | 112.54 | 57.42 | 3.72 | 34.56 | 10.50 |      | 11.26 | 1.92 |       | 231.90   |
|      |          | $V$        | 43.00  | 23.72 | 1.50 | 14.30 | 4.67  |      | 4.66  | 0.78 |       | 92.63    |
|      |          | $\Delta_S$ | 48.53  | 24.76 | 1.60 | 14.90 | 4.53  |      | 4.86  | 0.83 |       | 100.00   |
| VIII | DORDUM05 | $k$        | 48     | 102   | 40   | 20    | 22    |      | 4     | 2    | 2     | 240      |
|      |          | $d_{\min}$ | 1.76   | 2.02  | 2.22 | 2.05  | 2.12  |      | 2.40  | 2.39 | 2.26  | 1.76     |
|      |          | $d_{\max}$ | 4.20   | 4.02  | 3.60 | 3.15  | 3.30  |      | 2.50  | 2.39 | 2.26  | 4.20     |
|      |          | $S$        | 104.52 | 55.66 | 5.03 | 32.89 | 10.20 |      | 13.05 | 0.40 | 0.55  | 222.28   |
|      |          | $V$        | 40.08  | 23.16 | 2.02 | 13.71 | 4.79  |      | 5.31  | 0.16 | 0.21  | 89.43    |
|      |          | $\Delta_S$ | 47.02  | 25.04 | 2.26 | 14.80 | 4.59  |      | 5.87  | 0.18 | 0.25  | 100.00   |

Table S2 (continued)

| Form | Refcode  |            | H/H    | H/C   | C/C  | H/N   | C/N   | N/N | H/O   | C/O  | N/O | $\Sigma$ |
|------|----------|------------|--------|-------|------|-------|-------|-----|-------|------|-----|----------|
| IX   | DORDUM06 | $k$        | 52     | 104   | 44   | 28    | 22    |     | 4     | 2    |     | 256      |
|      |          | $d_{\min}$ | 1.72   | 2.03  | 2.21 | 2.05  | 2.10  |     | 2.42  | 2.37 |     | 1.72     |
|      |          | $d_{\max}$ | 4.08   | 3.73  | 3.45 | 3.41  | 3.50  |     | 2.47  | 2.37 |     | 4.08     |
|      |          | $S$        | 125.96 | 60.96 | 3.61 | 32.80 | 9.07  |     | 9.77  | 0.58 |     | 242.74   |
|      |          | $V$        | 46.37  | 25.72 | 1.47 | 14.12 | 4.33  |     | 3.97  | 0.23 |     | 96.21    |
|      |          | $\Delta_S$ | 51.89  | 25.11 | 1.49 | 13.51 | 3.74  |     | 4.02  | 0.24 |     | 100.00   |
| X    | DORDUM07 | $k$        | 48     | 112   | 36   | 28    | 20    |     | 4     | 2    |     | 250      |
|      |          | $d_{\min}$ | 1.52   | 1.93  | 2.21 | 1.95  | 2.13  |     | 2.42  | 2.38 |     | 1.52     |
|      |          | $d_{\max}$ | 3.56   | 4.25  | 2.99 | 3.66  | 3.17  |     | 2.44  | 2.38 |     | 4.25     |
|      |          | $S$        | 118.51 | 69.17 | 3.66 | 43.69 | 12.82 |     | 11.11 | 0.12 |     | 259.08   |
|      |          | $V$        | 41.94  | 29.46 | 1.45 | 18.36 | 6.16  |     | 4.49  | 0.05 |     | 101.90   |
|      |          | $\Delta_S$ | 45.74  | 26.70 | 1.41 | 16.86 | 4.95  |     | 4.29  | 0.05 |     | 100.00   |

Table S3. Characteristics of intermolecular noncovalent interactions in GAL polymorphs (VD polyhedra faces with RF = 0)

| Form | Refcode  |                         | H/H    | H/C    | C/C   | H/N   | C/N  | N/N  | H/O   | C/O  | N/O | O/O | $\Sigma$ |
|------|----------|-------------------------|--------|--------|-------|-------|------|------|-------|------|-----|-----|----------|
| I    | DORDUM09 | <i>k</i>                | 129    | 118    | 35    | 50    | 12   | 6    | 18    | 4    |     |     | 372      |
|      |          | <i>d</i> <sub>min</sub> | 2.12   | 2.83   | 3.58  | 2.41  | 3.38 | 3.80 | 1.84  | 3.53 |     |     | 1.84     |
|      |          | <i>d</i> <sub>max</sub> | 5.12   | 4.60   | 4.42  | 4.91  | 4.43 | 4.12 | 3.51  | 3.70 |     |     | 5.12     |
|      |          | <i>S</i>                | 235.21 | 107.78 | 10.82 | 68.10 | 7.43 | 3.52 | 35.55 | 0.05 |     |     | 468.46   |
|      |          | <i>V</i>                | 113.46 | 60.07  | 7.17  | 34.88 | 4.34 | 2.30 | 15.62 | 0.03 |     |     | 237.87   |
|      |          | $\Delta_S$              | 50.21  | 23.01  | 2.31  | 14.54 | 1.59 | 0.75 | 7.59  | 0.01 |     |     | 100.00   |
| II   | DORDUM   | <i>k</i>                | 134    | 136    | 27    | 42    | 16   | 3    | 14    | 4    |     |     | 376      |
|      |          | <i>d</i> <sub>min</sub> | 2.42   | 2.73   | 3.54  | 2.21  | 3.44 | 3.47 | 2.01  | 4.21 |     |     | 2.01     |
|      |          | <i>d</i> <sub>max</sub> | 6.26   | 5.91   | 4.30  | 4.00  | 3.99 | 3.49 | 4.06  | 4.50 |     |     | 6.26     |
|      |          | <i>S</i>                | 238.79 | 106.39 | 11.91 | 64.74 | 6.97 | 2.13 | 36.60 | 1.96 |     |     | 469.48   |
|      |          | <i>V</i>                | 135.82 | 59.73  | 7.34  | 30.38 | 4.21 | 1.23 | 16.40 | 1.38 |     |     | 256.49   |
|      |          | $\Delta_S$              | 50.86  | 22.66  | 2.54  | 13.79 | 1.48 | 0.45 | 7.80  | 0.42 |     |     | 100.00   |
| III  | DORDUM01 | <i>k</i>                | 126    | 150    | 12    | 48    | 16   |      | 14    | 4    |     |     | 370      |
|      |          | <i>d</i> <sub>min</sub> | 2.32   | 2.69   | 3.65  | 2.64  | 3.60 |      | 2.06  | 3.15 |     |     | 2.06     |
|      |          | <i>d</i> <sub>max</sub> | 4.78   | 4.66   | 4.09  | 4.61  | 4.36 |      | 3.34  | 3.23 |     |     | 4.78     |
|      |          | <i>S</i>                | 214.27 | 115.61 | 3.59  | 74.64 | 6.07 |      | 36.68 | 0.89 |     |     | 451.74   |
|      |          | <i>V</i>                | 108.10 | 63.96  | 2.29  | 37.34 | 3.78 |      | 16.44 | 0.47 |     |     | 232.38   |
|      |          | $\Delta_S$              | 47.43  | 25.59  | 0.79  | 16.52 | 1.34 |      | 8.12  | 0.20 |     |     | 100.00   |
| IV   | DORDUM02 | <i>k</i>                | 124    | 170    | 11    | 44    | 17   | 4    | 14    | 6    |     |     | 389      |
|      |          | <i>d</i> <sub>min</sub> | 2.31   | 2.68   | 3.55  | 2.14  | 3.43 | 3.39 | 1.98  | 3.85 |     |     | 1.98     |
|      |          | <i>d</i> <sub>max</sub> | 5.08   | 4.92   | 4.76  | 4.28  | 4.11 | 3.97 | 4.53  | 4.87 |     |     | 5.08     |
|      |          | <i>S</i>                | 217.91 | 120.97 | 3.49  | 63.16 | 5.92 | 3.42 | 35.84 | 2.69 |     |     | 453.39   |
|      |          | <i>V</i>                | 110.73 | 67.76  | 2.26  | 30.84 | 3.71 | 2.01 | 15.42 | 1.83 |     |     | 234.55   |
|      |          | $\Delta_S$              | 48.06  | 26.68  | 0.77  | 13.93 | 1.31 | 0.75 | 7.91  | 0.59 |     |     | 100.00   |
|      | IVa      | <i>k</i>                | 125    | 165    | 12    | 41    | 16   | 5    | 18    | 12   |     |     | 394      |
|      |          | <i>d</i> <sub>min</sub> | 2.31   | 2.68   | 3.55  | 2.14  | 3.43 | 3.39 | 1.98  | 3.85 |     |     | 1.98     |
|      |          | <i>d</i> <sub>max</sub> | 5.08   | 4.92   | 4.76  | 4.21  | 4.11 | 3.97 | 4.53  | 4.87 |     |     | 5.08     |
|      |          | <i>S</i>                | 217.53 | 121.26 | 4.25  | 57.50 | 5.30 | 4.28 | 45.97 | 5.37 |     |     | 461.45   |
|      |          | <i>V</i>                | 109.61 | 68.62  | 2.73  | 26.93 | 3.26 | 2.56 | 19.95 | 3.67 |     |     | 237.32   |
|      |          | $\Delta_S$              | 47.14  | 26.28  | 0.92  | 12.46 | 1.15 | 0.93 | 9.96  | 1.16 |     |     | 100.00   |
|      | IVb      | <i>k</i>                | 123    | 175    | 9     | 47    | 18   | 2    | 10    |      |     |     | 384      |
|      |          | <i>d</i> <sub>min</sub> | 2.31   | 2.68   | 3.93  | 2.14  | 3.43 | 3.39 | 1.98  |      |     |     | 1.98     |
|      |          | <i>d</i> <sub>max</sub> | 5.08   | 4.71   | 4.45  | 4.28  | 4.11 | 3.58 | 3.43  |      |     |     | 5.08     |
|      |          | <i>S</i>                | 218.28 | 120.67 | 2.73  | 68.81 | 6.54 | 2.56 | 25.72 |      |     |     | 445.31   |
|      |          | <i>V</i>                | 111.85 | 66.89  | 1.79  | 34.76 | 4.16 | 1.46 | 10.89 |      |     |     | 231.80   |
|      |          | $\Delta_S$              | 49.02  | 27.10  | 0.61  | 15.45 | 1.47 | 0.57 | 5.78  |      |     |     | 100.00   |



Table S3 (continued)

| Form | Refcode  |            | H/H    | H/C    | C/C   | H/N   | C/N   | N/N  | H/O   | C/O  | N/O  | O/O  | $\Sigma$ |
|------|----------|------------|--------|--------|-------|-------|-------|------|-------|------|------|------|----------|
| V    | DORDUM03 | $k$        | 132    | 132    | 50    | 36    | 34    | 6    | 22    | 10   |      |      | 422      |
|      |          | $d_{\min}$ | 2.12   | 2.76   | 3.61  | 2.28  | 3.40  | 3.68 | 2.02  | 3.74 |      |      | 2.02     |
|      |          | $d_{\max}$ | 4.44   | 4.46   | 4.24  | 4.16  | 3.95  | 4.02 | 4.21  | 4.26 |      |      | 4.46     |
|      |          | $S$        | 240.94 | 88.47  | 18.03 | 46.32 | 24.10 | 0.84 | 38.44 | 3.95 |      |      | 461.08   |
|      |          | $V$        | 110.82 | 50.02  | 11.28 | 23.79 | 14.46 | 0.52 | 17.66 | 2.50 |      |      | 231.05   |
|      |          | $\Delta_S$ | 52.25  | 19.19  | 3.91  | 10.05 | 5.23  | 0.18 | 8.34  | 0.86 |      |      | 100.00   |
| VI   | DORDUM04 | $k$        | 127    | 166    | 8     | 38    | 14    | 3    | 16    | 2    | 4    |      | 378      |
|      |          | $d_{\min}$ | 2.43   | 2.76   | 3.81  | 2.14  | 3.54  | 3.69 | 2.43  | 3.43 | 3.44 |      | 2.14     |
|      |          | $d_{\max}$ | 4.81   | 4.58   | 4.21  | 3.95  | 4.17  | 3.75 | 4.76  | 3.43 | 3.61 |      | 4.81     |
|      |          | $S$        | 216.63 | 132.69 | 0.57  | 62.72 | 5.68  | 1.34 | 34.57 | 0.63 | 2.98 |      | 457.80   |
|      |          | $V$        | 111.38 | 74.80  | 0.39  | 28.60 | 3.44  | 0.83 | 16.59 | 0.36 | 1.78 |      | 238.17   |
|      |          | $\Delta_S$ | 47.32  | 28.98  | 0.12  | 13.70 | 1.24  | 0.29 | 7.55  | 0.14 | 0.65 |      | 100.00   |
| VII  | DORDUM10 | $k$        | 125    | 151    | 41    | 51    | 13    | 5    | 14    | 5    | 1    | 1    | 406      |
|      |          | $d_{\min}$ | 2.10   | 2.51   | 3.46  | 2.10  | 3.33  | 3.25 | 2.08  | 3.55 | 3.90 | 3.09 | 2.08     |
|      |          | $d_{\max}$ | 5.02   | 4.61   | 4.71  | 4.16  | 4.14  | 3.86 | 4.89  | 4.35 | 3.90 | 3.09 | 5.02     |
|      |          | $S$        | 218.70 | 113.05 | 15.07 | 64.66 | 5.34  | 5.39 | 35.51 | 2.55 | 0.23 | 0.70 | 461.20   |
|      |          | $V$        | 104.35 | 61.40  | 9.55  | 30.61 | 3.20  | 3.17 | 15.62 | 1.57 | 0.15 | 0.36 | 229.99   |
|      |          | $\Delta_S$ | 47.42  | 24.51  | 3.27  | 14.02 | 1.16  | 1.17 | 7.70  | 0.55 | 0.05 | 0.15 | 100.00   |
|      | VIIa     | $k$        | 126    | 148    | 41    | 52    | 11    | 5    | 15    | 6    | 2    |      | 406      |
|      |          | $d_{\min}$ | 2.10   | 2.51   | 2.51  | 2.11  | 3.33  | 3.25 | 2.08  | 3.55 | 3.90 |      | 2.08     |
|      |          | $d_{\max}$ | 5.02   | 4.61   | 4.61  | 4.16  | 4.14  | 3.86 | 3.74  | 4.35 | 3.90 |      | 5.02     |
|      |          | $S$        | 216.05 | 112.41 | 15.06 | 69.08 | 5.28  | 5.62 | 31.30 | 4.61 | 0.46 |      | 459.87   |
|      |          | $V$        | 101.64 | 60.51  | 9.55  | 32.79 | 3.17  | 3.35 | 15.05 | 2.83 | 0.30 |      | 229.19   |
|      |          | $\Delta_S$ | 46.98  | 24.44  | 3.27  | 15.02 | 1.15  | 1.22 | 6.81  | 1.00 | 0.10 |      | 100.00   |
|      | VIIb     | $k$        | 123    | 154    | 41    | 50    | 15    | 5    | 13    | 4    |      | 1    | 406      |
|      |          | $d_{\min}$ | 2.17   | 2.51   | 2.51  | 2.10  | 3.33  | 3.25 | 2.08  | 3.56 |      | 3.09 | 2.08     |
|      |          | $d_{\max}$ | 4.79   | 4.61   | 4.61  | 4.16  | 3.98  | 3.82 | 4.89  | 4.35 |      | 3.09 | 4.89     |
|      |          | $S$        | 221.36 | 113.70 | 15.08 | 60.24 | 5.40  | 5.15 | 39.72 | 0.48 |      | 1.39 | 462.52   |
|      |          | $V$        | 107.05 | 62.30  | 9.56  | 28.43 | 3.24  | 2.99 | 16.19 | 0.32 |      | 0.72 | 230.80   |
|      |          | $\Delta_S$ | 47.86  | 24.58  | 3.26  | 13.02 | 1.17  | 1.11 | 8.59  | 0.10 |      | 0.30 | 100.00   |
| VIII | DORDUM05 | $k$        | 122    | 164    | 30    | 42    | 20    | 6    | 14    | 2    |      |      | 400      |
|      |          | $d_{\min}$ | 2.08   | 2.63   | 3.23  | 2.13  | 3.34  | 3.35 | 2.09  | 3.86 |      |      | 2.08     |
|      |          | $d_{\max}$ | 4.71   | 4.49   | 3.90  | 4.08  | 3.96  | 4.13 | 4.02  | 3.86 |      |      | 4.71     |
|      |          | $S$        | 233.60 | 116.99 | 10.86 | 61.65 | 14.22 | 2.23 | 39.95 | 0.34 |      |      | 479.85   |
|      |          | $V$        | 111.68 | 63.60  | 6.30  | 29.39 | 8.30  | 1.29 | 18.98 | 0.22 |      |      | 239.75   |
|      |          | $\Delta_S$ | 48.68  | 24.38  | 2.26  | 12.85 | 2.96  | 0.46 | 8.32  | 0.07 |      |      | 100.00   |

Table S3 (continued)

| Form | Refcode  |            | H/H    | H/C    | C/C   | H/N   | C/N   | N/N  | H/O   | C/O  | N/O | O/O   | $\Sigma$ |
|------|----------|------------|--------|--------|-------|-------|-------|------|-------|------|-----|-------|----------|
| IX   | DORDUM06 | $k$        | 119    | 148    | 32    | 50    | 20    | 3    | 16    | 4    |     |       | 392      |
|      |          | $d_{\min}$ | 2.00   | 2.57   | 3.23  | 2.15  | 3.24  | 3.62 | 2.04  | 4.08 |     |       | 2.00     |
|      |          | $d_{\max}$ | 5.62   | 4.59   | 4.39  | 5.47  | 4.04  | 3.81 | 3.95  | 4.25 |     |       | 5.62     |
|      |          | $S$        | 225.10 | 122.34 | 11.38 | 62.49 | 15.56 | 1.88 | 38.74 | 0.46 |     |       | 477.94   |
|      |          | $V$        | 106.17 | 69.54  | 6.63  | 29.35 | 8.82  | 1.14 | 17.87 | 0.32 |     |       | 239.84   |
|      |          | $\Delta_S$ | 47.10  | 25.60  | 2.38  | 13.07 | 3.26  | 0.39 | 8.11  | 0.10 |     |       | 100.00   |
| X    | DORDUM07 | $k$        | 123    | 126    | 48    | 44    | 32    | 6    | 18    |      |     | 1     | 398      |
|      |          | $d_{\min}$ | 2.37   | 2.72   | 3.29  | 2.40  | 3.34  | 3.78 | 2.00  |      |     | 3.52  | 2.00     |
|      |          | $d_{\max}$ | 4.35   | 4.14   | 4.43  | 4.28  | 4.14  | 3.97 | 4.33  |      |     | 3.52  | 4.43     |
|      |          | $S$        | 220.30 | 100.59 | 9.94  | 46.74 | 23.20 | 1.11 | 39.41 |      |     | 0.01  | 441.28   |
|      |          | $V$        | 108.18 | 54.64  | 6.35  | 22.70 | 13.49 | 0.72 | 17.84 |      |     | <0,01 | 223.92   |
|      |          | $\Delta_S$ | 49.92  | 22.80  | 2.25  | 10.59 | 5.26  | 0.25 | 8.93  |      |     | <0,01 | 100.00   |
